# Supplementary material for: “Hot Hand” on Strike: Bowling Data Indicates Correlation to Recent Past Results, Not Causality
Source: PLOS journal article supplement (doi:10.1371/journal.pone.0030112), 2012-01-12
Supplement: S1 (10.1371/journal.pone.0030112.s001) [file journal.pone.0030112.s001]

## SUPPORTING INFORMATION:

### “Hot hand” on strike: Bowling data indicate correlation to recent past results, not causality.

Gur Yaari<sup>1,\*</sup>, Gil David<sup>2</sup>

**1** Department of Pathology, Yale School of Medicine, New Haven, CT 06511, USA

**2** Department of Mathematics, Program in Applied Mathematics, Yale University, New Haven, CT 06510, USA

\* E-mail: gur.yaari@yale.edu

## 1 Test for independence or rather nonstationary?

Dorsey-Palmateer and Smith [1] and Martin [2] considered a situation where a strike in Bowling is a success and a non-strike is a failure. They calculated the probability of a success given that the previous  $j$  trials were all successful and compared it to the probability of a success given that the previous  $j$  trials were all failures. They have obtained from their data systematic deviations between these two values and concluded that this is a sign for dependency between the current trial and the previous one(s). We show that their conclusion does not imply *causal dependency* between current result and previous one as this test detects also nonstationary probability of success (with repeated *independent* trials). In order to show it, let us hypothesis a non stationary Bernoulli independent trials with the following parameters: the system switches between two modes, 1 and 2. A fraction  $F$  of the time the system is in mode 1 and a fraction  $1 - F$  the system is in mode 2. The switchings are done either in time lags drawn from a Poisson distribution without any dependency of the current or past results or in fixed times. When the system is in mode 1 the probability of success is  $p_1$  while when it is in mode 2, the probability of success is  $p_2$ . One can calculate the overall success rate given that the last  $j$  trials were all failures to be

$$P(1|\overbrace{0, 0, \dots, 0}^{j \text{ times}}) = \frac{Fp_1(1-p_1)^j + (1-F)p_2(1-p_2)^j}{F(1-p_1)^j + (1-F)(1-p_2)^j} \quad (1)$$

vs. the opposite scenario where all the last  $j$  trials were a success

$$P(1|\overbrace{1, 1, \dots, 1}^{j \text{ times}}) = \frac{Fp_1^{j+1} + (1-F)p_2^{j+1}}{Fp_1^j + (1-F)p_2^j} \quad (2)$$

. These expressions are different (when  $p_1 \neq p_2$ ) and depend on  $j$  what prove the claim.

## Figures

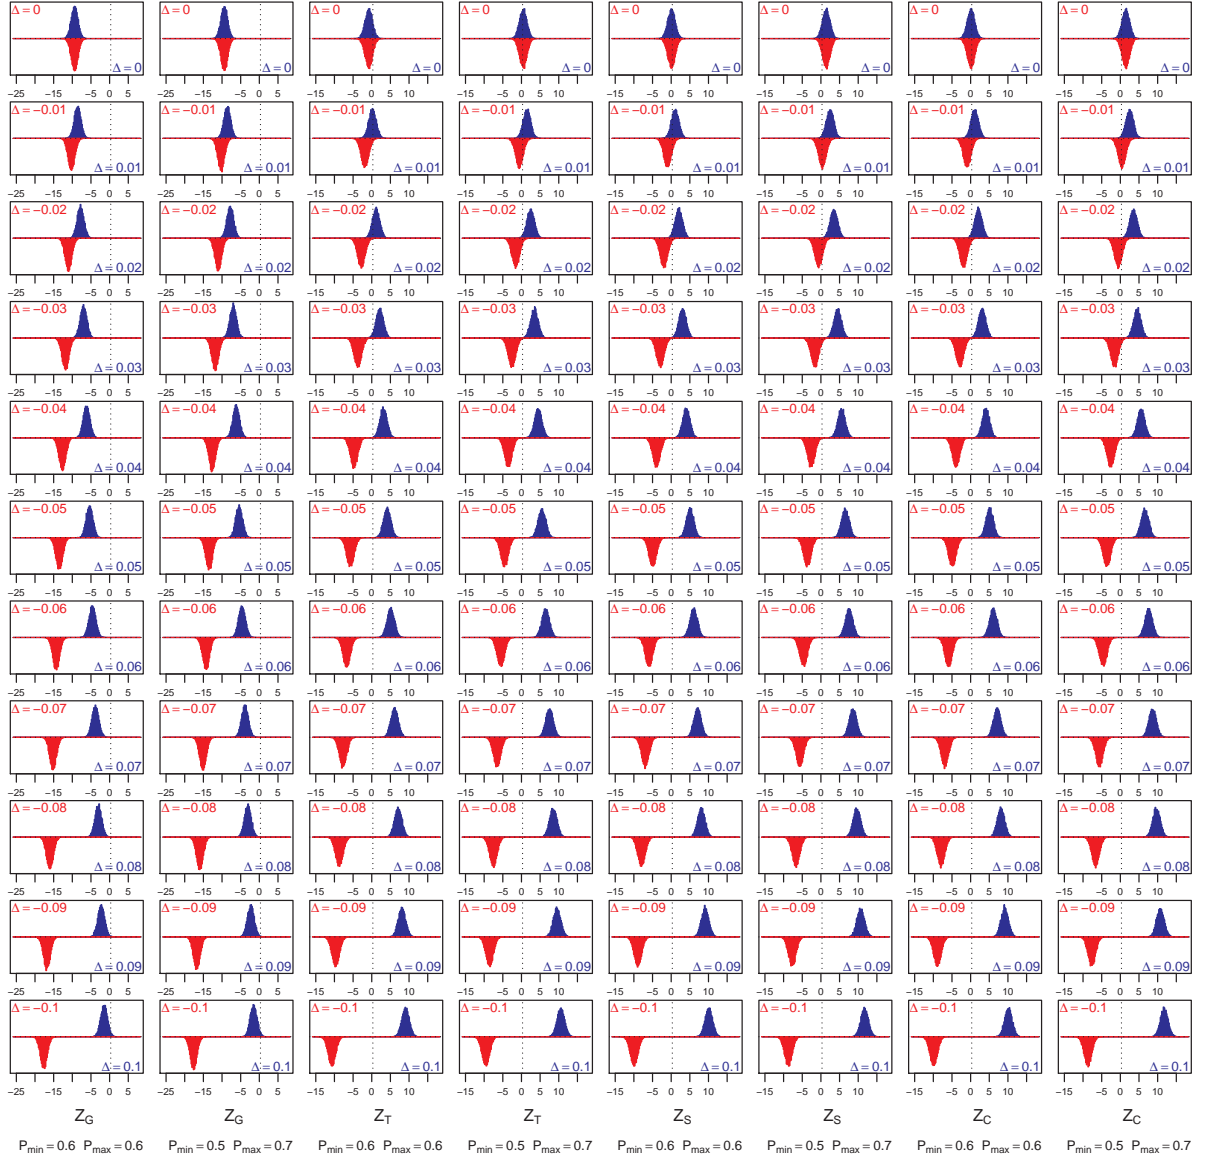

**Figure 1. Method validation with simulations**

Distributions of  $Z$  for different aggregation levels (games, tournaments, seasons and career:  $G/T/S/C$ ) and different values of  $\Delta$  and  $\Delta P$ . Different rows correspond to different values of  $\Delta$ . Blue bars refer to positive  $\Delta$ 's while red refer to negative  $\Delta$ 's. The different columns correspond to different aggregation levels and different values of  $\Delta P$ 's as indicated in the legends.

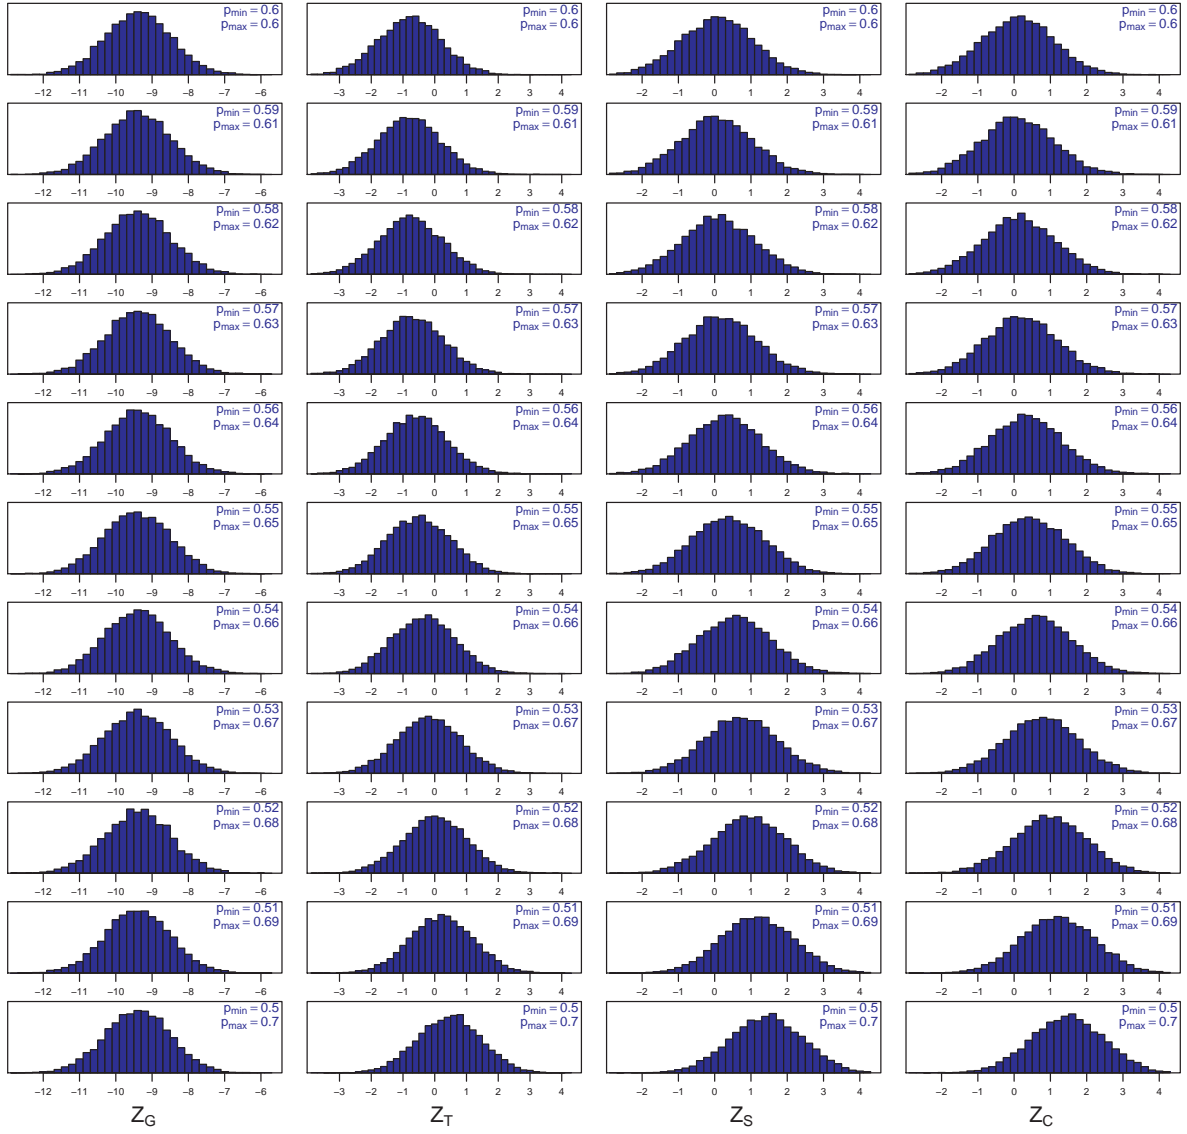

**Figure 2. Method validation with simulations**

Distributions of  $Z$  for different aggregation levels (games, tournaments, seasons and career: G/T/S/C) and different values of  $\Delta P$  ( $\Delta = 0$  in all plots). Different rows correspond to different values of  $\Delta P$ , while different columns correspond to different aggregation levels and different values of  $\Delta P$ 's as indicated in the legends. One sees the shift in the distributions for across the different rows for all aggregation levels but the games (G) as expected.

## Table

## References

1. Dorsey-Palmateer R, Smith G (2004) Bowlers' hot hands. *The American Statistician* 58: 38–45.
2. Martin DEK (2006) Hot-hand effects in sports and a recursive method of computing probabilities for streaks. *Comput Oper Res* 33: 1983–2001.

| Ref. number | Player name            | Number of games |
|-------------|------------------------|-----------------|
| 13248       | Chris Barnes           | 1501            |
| 11534       | Walter Ray Williams Jr | 1403            |
| 4646        | Tommy Jones            | 1306            |
| 2122        | Patrick Allen          | 1159            |
| 1978        | Ryan Shafer            | 1137            |
| 7258        | Mika Koivuniemi        | 1123            |
| 8642        | Wes Malott             | 1113            |
| 9630        | Pete Weber             | 1108            |
| 2213        | Brad Angelo            | 1082            |
| 8678        | Norm Duke              | 1017            |
| 2771        | Parker Bohn III        | 991             |
| 1713        | Michael Fagan          | 932             |
| 11093       | Mike DeVaney           | 902             |
| 12233       | Robert Smith           | 871             |
| 1119        | Jason Couch            | 838             |
| 6779        | Steve Jaros            | 835             |
| 3375        | Michael Machuga        | 823             |
| 3741        | Danny Wiseman          | 732             |
| 1991        | Doug Kent              | 695             |
| 12759       | Chris Loschetter       | 666             |
| 6076        | Eugene McCune          | 662             |
| 20327       | Sean Rash              | 640             |
| 2419        | Joe Ciccone            | 613             |
| 8457        | Mike Edwards           | 613             |
| 9680        | Brian Voss             | 604             |
| 5457        | Brian Kretzer          | 603             |
| 6077        | Mike Wolfe             | 601             |
| 2333        | Tommy Delutz Jr        | 561             |
| 11908       | Amleto Monacelli       | 558             |
| 1544        | Tom Baker              | 551             |
| 2021        | Patrick Healey JR      | 542             |
| 11216       | Michael Haugen Jr      | 535             |
| 10991       | Tony Reyes             | 496             |
| 5913        | Dave D'Entremont       | 492             |
| 6673        | Jeff Carter            | 439             |
| 5543        | Brian Himmler          | 437             |
| 3772        | Tim Criss              | 416             |
| 9803        | Lonnie Waliczek        | 404             |
| 9861        | Rick Steelsmith        | 400             |
| 12410       | Ronnie Russell         | 388             |
| 11228       | Jason Hurd             | 385             |
| 35089       | Rhino Page             | 362             |
| 19657       | Dino Castillo          | 324             |
| 12479       | Chris Johnson          | 320             |
| 8328        | Paul Fleming           | 319             |
| 36058       | Jason Belmonte         | 309             |
| 8721        | Chris Warren           | 298             |
| 1919        | Brian LeClair          | 297             |
| 8548        | Rick Lawrence          | 288             |
| 9941        | Hugh Miller            | 263             |

**Table 1.** Names of players included in the analysis along with their ref. number and number of games recorded

| Ref. number | Player name           | Number of games |
|-------------|-----------------------|-----------------|
| 30957       | Billy Oatman          | 256             |
| 12476       | Nathan Bohr           | 255             |
| 10645       | Bryon Smith           | 249             |
| 11988       | Steve Wilson          | 245             |
| 11460       | Dennis Horan Jr       | 230             |
| 8015        | Mitch Beasley         | 230             |
| 30015       | Todd Book             | 229             |
| 3080        | Bob Learn JR          | 220             |
| 4402        | Christopher Collins   | 216             |
| 25886       | Eddie VanDaniker Jr   | 215             |
| 12932       | Troy Wollenbecker     | 213             |
| 33639       | Ryan Ciminelli        | 205             |
| 3883        | Richard Wolfe         | 197             |
| 5168        | Jeff Lizzi            | 197             |
| 4581        | Ken Simard            | 194             |
| 14831       | Liz Johnson           | 191             |
| 12299       | Eric Forkel           | 189             |
| 3208        | Jim Tomek Jr          | 185             |
| 12283       | Randy Pedersen        | 179             |
| 12108       | Peter Hernandez       | 177             |
| 12444       | Tom Smallwood         | 172             |
| 8707        | D.J. Archer           | 168             |
| 4916        | Tom Daugherty         | 167             |
| 13611       | Kelly Kulick          | 159             |
| 121         | Andres Gomez          | 156             |
| 7765        | Riga Kalfas           | 154             |
| 4482        | Randy Weiss           | 151             |
| 32863       | John Nolen            | 138             |
| 8541        | Del Ballard JR        | 134             |
| 8158        | Stevie Weber          | 134             |
| 12483       | Shannon Buchan        | 129             |
| 7516        | Dale Traber           | 128             |
| 12623       | Tore Torgersen        | 128             |
| 16774       | Chad Kloss            | 127             |
| 12606       | Tim Mack              | 127             |
| 6947        | Jason Queen           | 126             |
| 25853       | Jason Sterner         | 125             |
| 13610       | Carolyn Dorin-Ballard | 124             |
| 1574        | Chris Hayden          | 120             |
| 11920       | Steve Hoskins         | 113             |
| 6569        | Mike Mineman          | 112             |
| 12173       | Jim Pratt             | 105             |
| 12559       | Patrick Girard        | 105             |
| 13964       | Ken Abner             | 101             |
| 38705       | Dan MacLelland        | 94              |
| 6429        | Steve Rogers          | 93              |
| 34028       | PJ Haggerty           | 90              |
| 9822        | Bryan Goebel          | 90              |
| 2482        | Rudy Kasimakis        | 88              |
| 13805       | Bill Rowe             | 82              |

**Table 1.** Names of players included in the analysis along with their ref. number and number of games recorded
